# Supplementary material
Source: PubMed Central journal article supplement (PMC1899980)

**a**Low Ca<sup>2+</sup>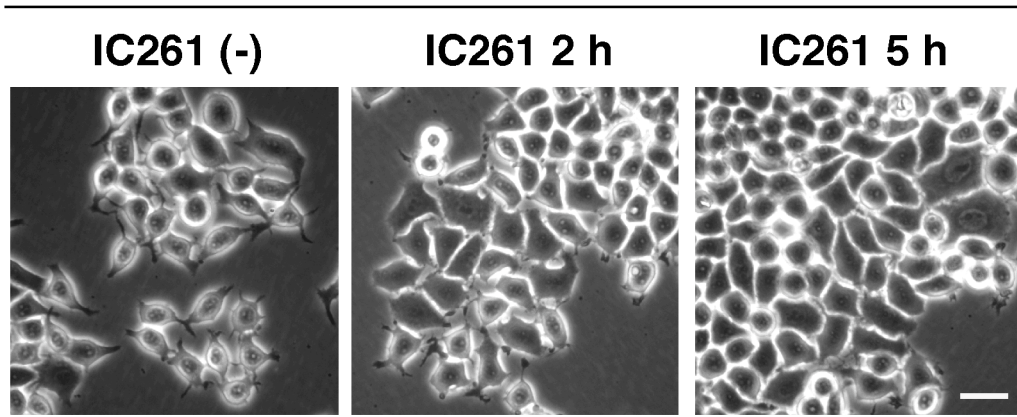**b**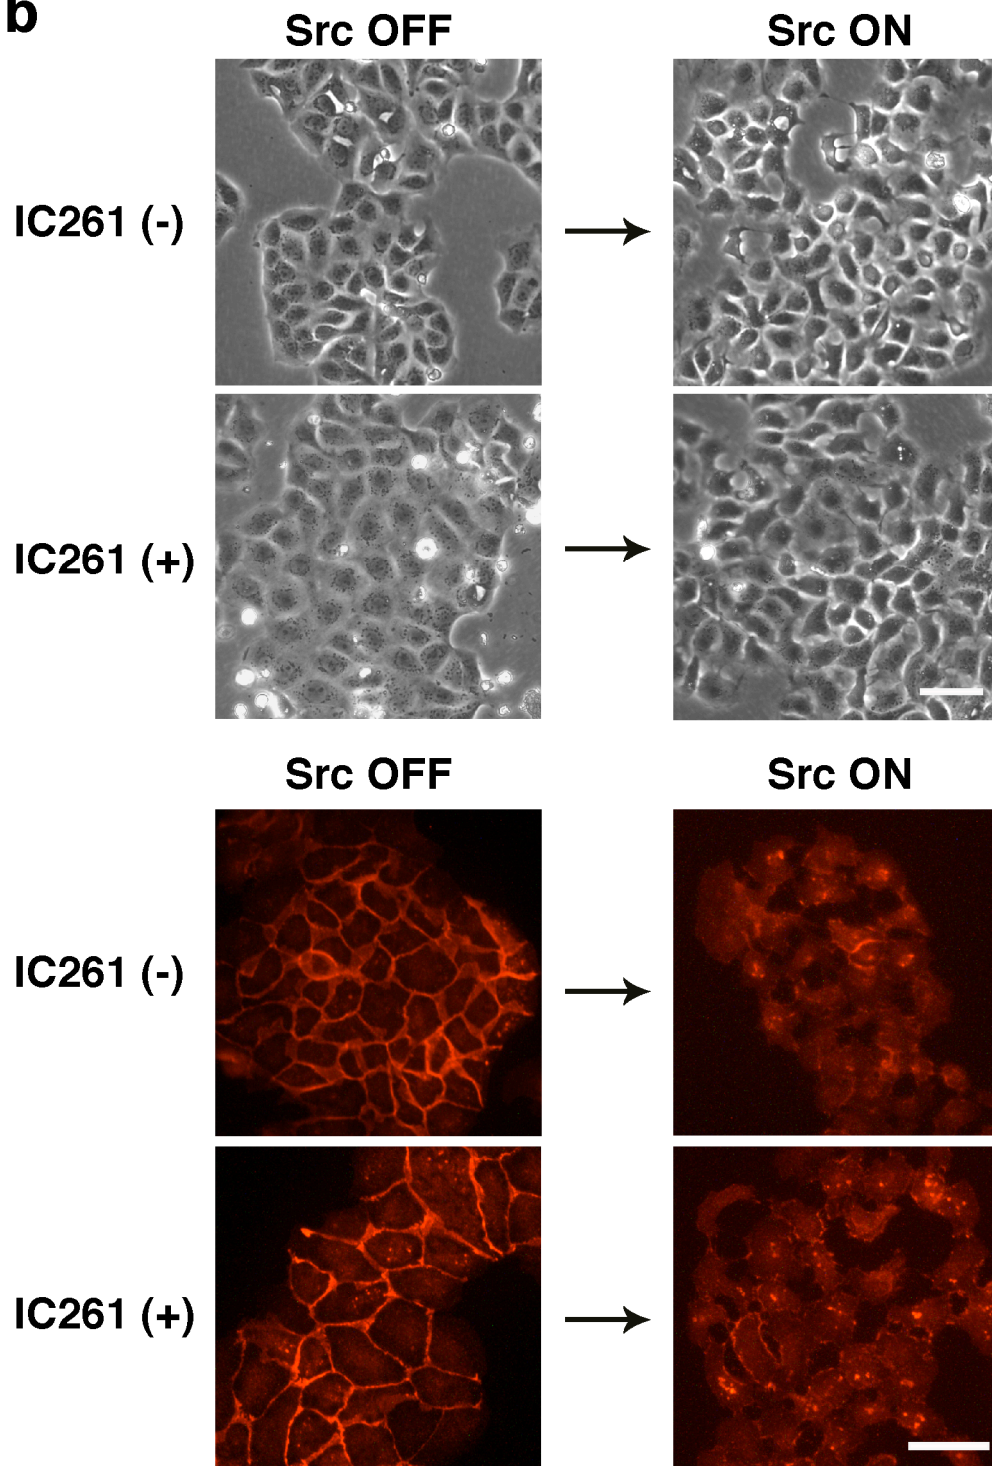

**a**

E-Cadherin

GFP-CK1 $\alpha$

Merge

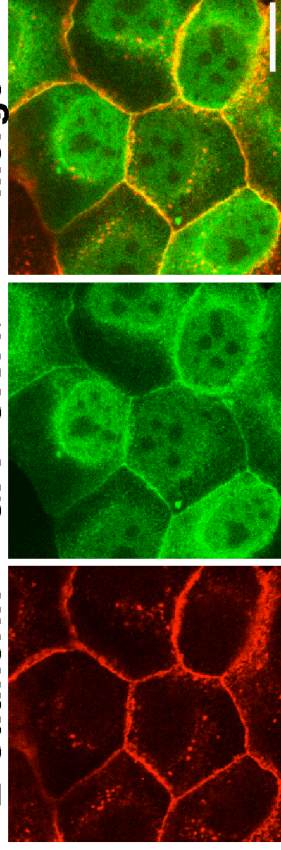

**b**

E-Cadherin

GFP-CK1 $\alpha$

Merge

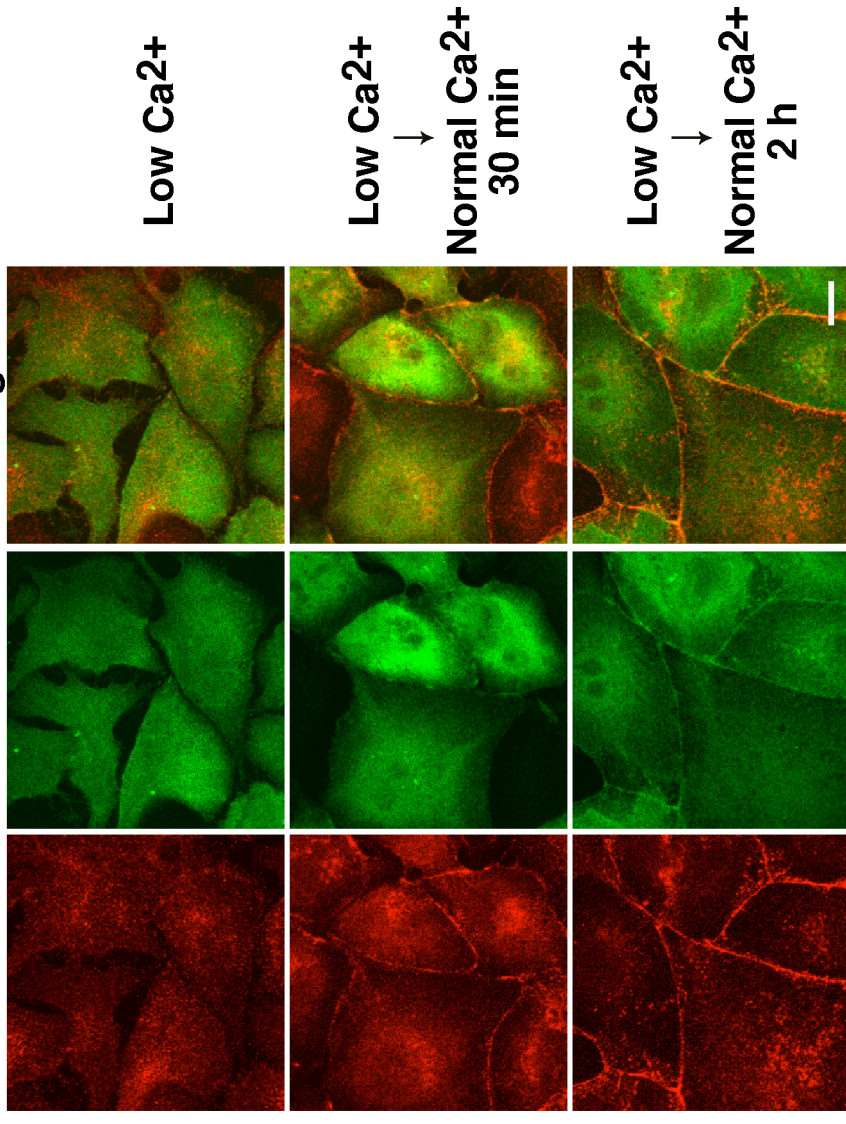

|               |               |                |               |   |               |     |     |
|---------------|---------------|----------------|---------------|---|---------------|-----|-----|
| -             | +             | -              | -             | + | +             | -   | -   |
| GSK-3 $\beta$ | GSK-3 $\beta$ | -              | GSK-3 $\beta$ | - | GSK-3 $\beta$ | CK1 | CK1 |
| GST           |               | GST-E-cad (WT) |               |   |               |     |     |
| 1             | 2             | 3              | 4             | 5 | 6             | 7   | 8   |

1st phosphorylation  
(CK1 & cold ATP)  
2nd phosphorylation  
([ $\gamma$ -<sup>32</sup>P] ATP)

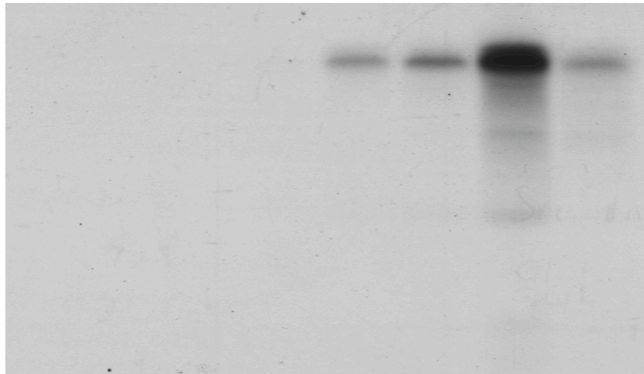

Autoradiography

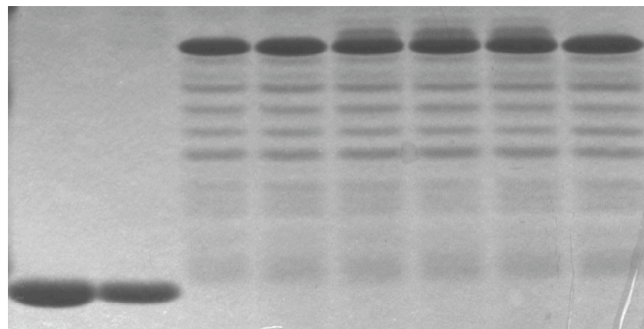

Coomassie  
protein staining

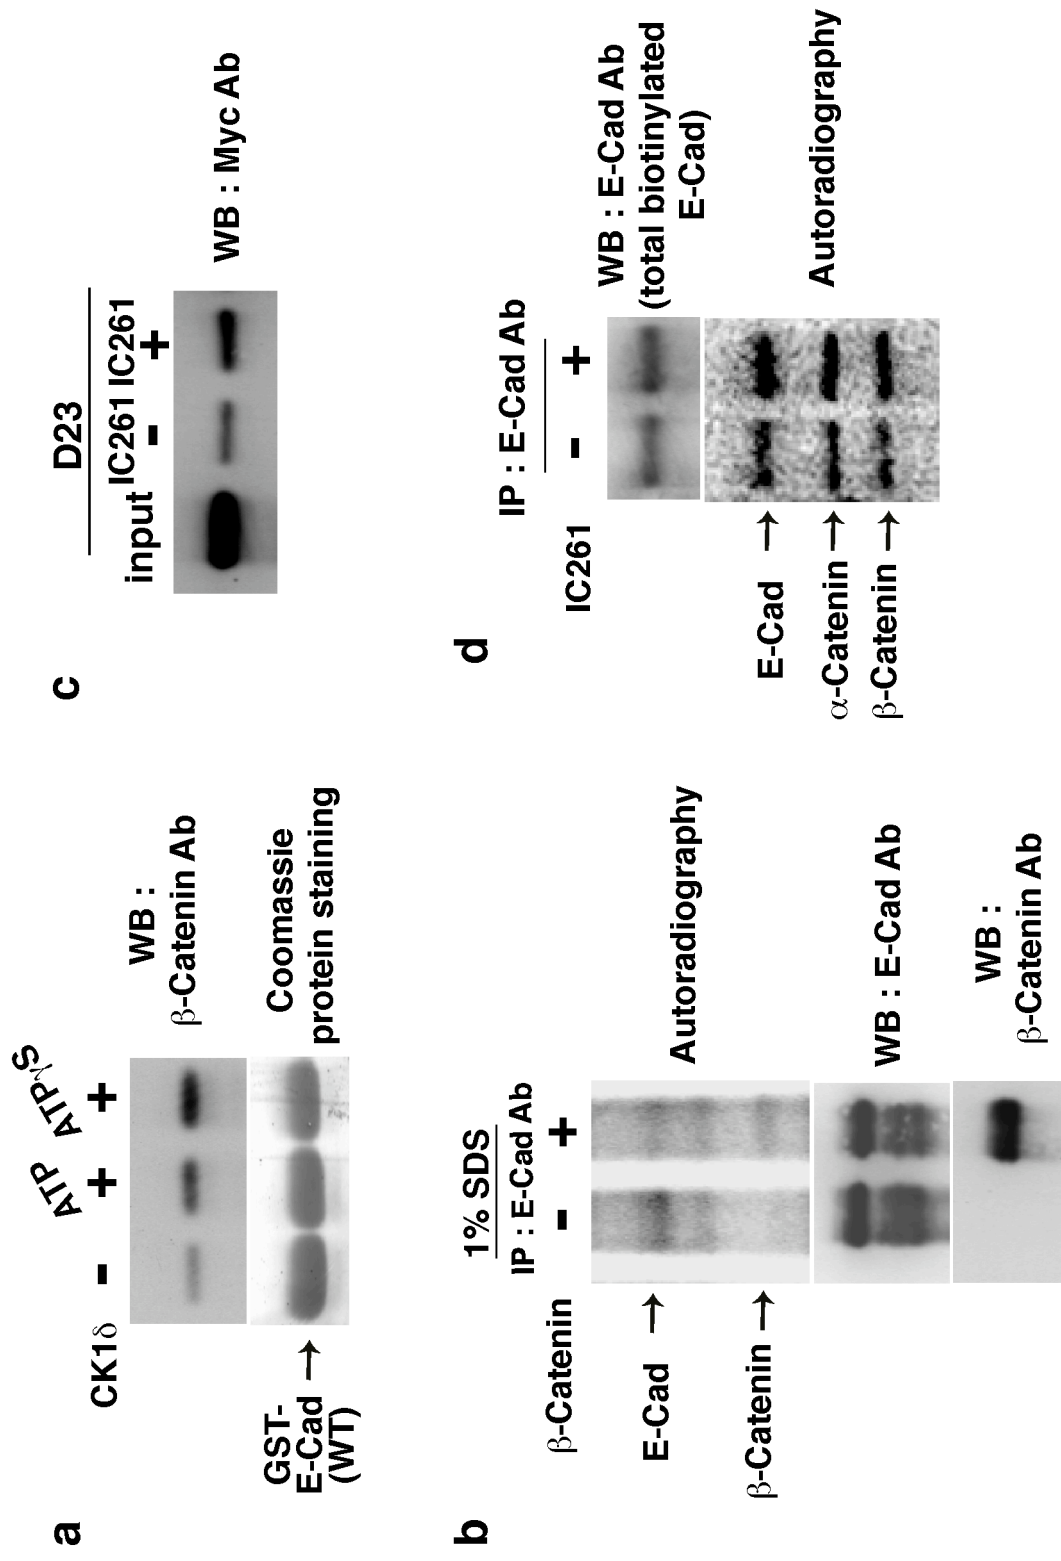

Supplement: molcellb_27_10_3804__1.pdf [file molcellb_27_10_3804__1.pdf]
